# Supplementary material
Source: publisher figshare collection journal article supplement (https://future-science-group.figshare.com/ndownloader/files/31606241)
Supplement: Supplementary file 1 [file 31606241]

**Supplementary Table 1.** Information on total and mapped sequencing reads.

| **Sample ID** | **Maternal Treatment** | **Total Reads** | **Mapped Reads** | **% of Mapped Reads** |
| --- | --- | --- | --- | --- |
| 10_S6:2005L5 | **Control** | 10,488,739 | 58,74,531 | 56.01 |
| 12_S5:2029R4 |  | 14,453,217 | 7,417,607 | 51.32 |
| 25_S3:3008R3 |  | 21,684,194 | 14,947,334 | 68.93 |
| 28_S2:3008R2 |  | 16,591,090 | 11,099,136 | 66.90 |
| 30_S1:3017L4 | **BPA** | 15,977,162 | 10,444,031 | 65.37 |
| 5_S8:2021R3 |  | 8,393,179 | 5,294,406 | 63.08 |
| 8_S7:2027R2 |  | 14,924,729 | 7,956,408 | 53.31 |
| 14_S4:2009R2 |  | 12,864,694 | 8,116,068 | 63.09 |
| **Average** |  | 14,422,125.5 | 9,324,998.6 | 61.00 |
